# Supplementary material for: Metal-oxide assisted surface treatment of polyimide gate insulators for high-performance organic thin-film transistors
Source: Royal Society of Chemistry journal article supplement (doi:10.1039/c7cp01535f), 2017-01-01
Supplement: c7cp01535f1.pdf [file c7cp01535f1.pdf]

1 **Supplementary Materials: Metal-oxide assisted surface treatment of polyimide gate**  
2 **insulator for high-performance organic thin-film transistors**

3

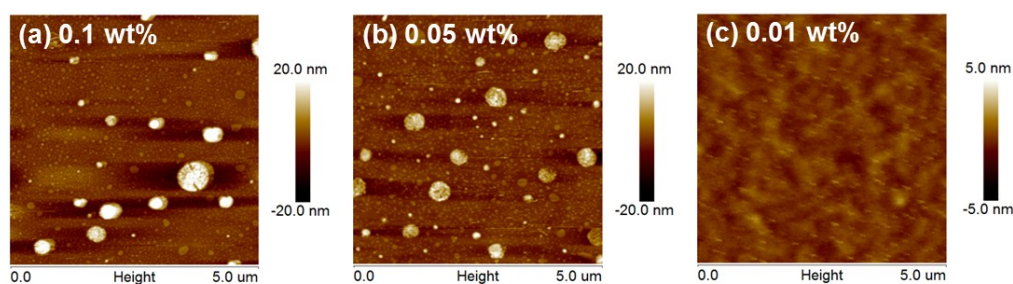

(d)

| ODPA concentration (wt%) | Water Contact angle (°) | Roughness (nm) |
|--------------------------|-------------------------|----------------|
| 0.1                      | 97.7                    | 4.48           |
| 0.05                     | 98.8                    | 3.22           |
| 0.01                     | 97.5                    | 0.41           |

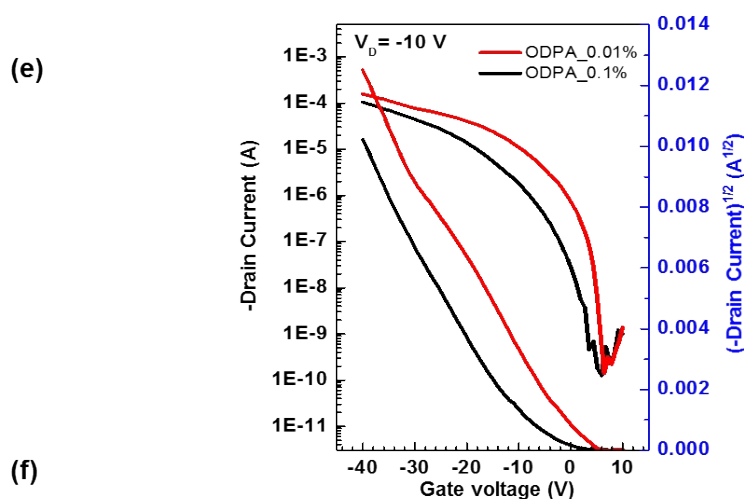

(f)

| OGI                                             | $\mu$ (cm <sup>2</sup> /Vs) | $V_{th}$ (V) | SS (V/dec) | $I_{on}$ (A) | $I_{off}$ (A) | $I_{on} / I_{off}$ |
|-------------------------------------------------|-----------------------------|--------------|------------|--------------|---------------|--------------------|
| ODPA(0.1%)/Al <sub>2</sub> O <sub>3</sub> /KPI  | 1.06                        | -8.53        | 7.13       | 1.03E-04     | 1.38E-10      | 7.47E+05           |
| ODPA(0.01%)/Al <sub>2</sub> O <sub>3</sub> /KPI | 1.46                        | -7.47        | 5.31       | 1.53E-04     | 1.56E-10      | 9.81E+05           |

4

5

6 **Fig. S1** (a-c) AFM images (5  $\mu\text{m} \times 5 \mu\text{m}$ ) of ODPA/ $\alpha$ -Al<sub>2</sub>O<sub>3</sub>/KPI thin films as different concentrations  
7 of ODPA in ethanol solution (0.1, 0.05 and 0.01 wt%), respectively. (d) Surface properties of each film  
8 were summarized in table. (e) Transfer curve and (f) electrical characteristics of Ph-BTBT-C<sub>10</sub> TFTs

- 1 with ODPA/ $\alpha$ -Al<sub>2</sub>O<sub>3</sub>/KPI gate insulators as different concentration of ODPA in ethanol solution (0.1
- 2 and 0.01 wt%)

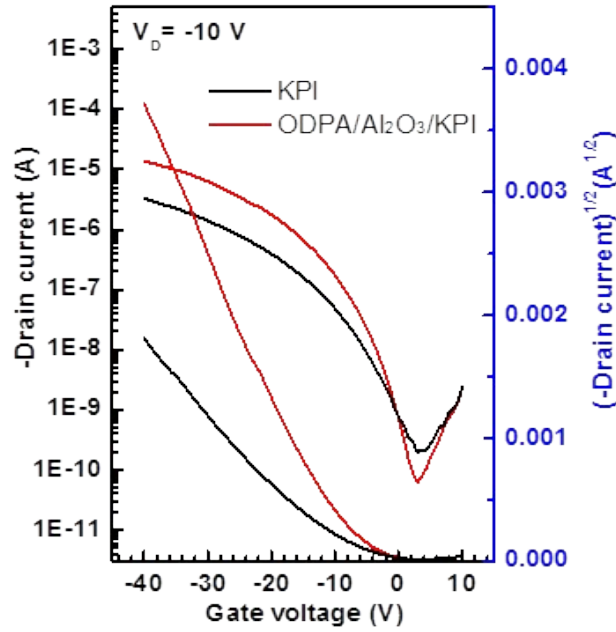

3  
4  
5

| Gate Insulator                                      | Mobility <sup>a</sup> [cm <sup>2</sup> /Vs] | V <sub>th</sub> [V] | S-slope [V/decade] | I <sub>on</sub> /I <sub>off</sub> |
|-----------------------------------------------------|---------------------------------------------|---------------------|--------------------|-----------------------------------|
| KPI                                                 | 0.04 ± 0.02                                 | -13.62              | 8.91               | 1.64 x 10 <sup>4</sup>            |
| ODPA/ $\alpha$ -Al <sub>2</sub> O <sub>3</sub> /KPI | 0.14 ± 0.03                                 | -9.57               | 6.55               | 2.17 x 10 <sup>5</sup>            |

6 <sup>a</sup> Average field-effect mobility of 12 TFT devices.

7

8 **Fig. S2** Transfer characteristics and electrical properties of the pentacene TFTs non-treated KPI and  
9 ODPA/ $\alpha$ -Al<sub>2</sub>O<sub>3</sub>/KPI gate insulators.

10

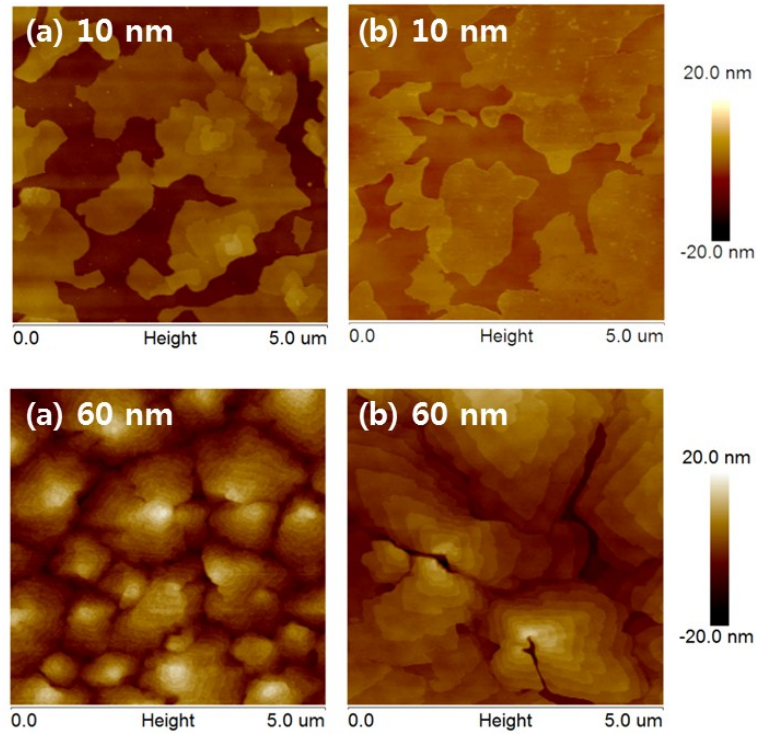

1

2 **Fig. S3** AFM images ( $5 \mu\text{m} \times 5 \mu\text{m}$ ) of 10 nm and 60 nm-thick pentacene layers on (a) non-treated KPI  
3 and (b) ODPA/ $\alpha$ -Al<sub>2</sub>O<sub>3</sub>-treated KPI gate insulator films.

4

5
